# Supplementary material for: Overexpression of Rice Expansin7 (Osexpa7) Confers Enhanced Tolerance to Salt Stress in Rice
Source: PubMed Central journal article supplement (PMC7013816; doi:10.3390/ijms21020454), 2020-01-10
Supplement: ijms-21-00454-s001.pdf [file ijms-21-00454-s001.pdf]

## Supplemental data

**Supplemental Table 1.** List of primer sequences used for vector construction.

| Transgenic line    | Primer             | Primer sequence (5' -> 3')       |
|--------------------|--------------------|----------------------------------|
| <b>PGD:OsEXPA7</b> | XhoI_PGD_F         | TTCTCGAG TAGATATGCCGAACATGAC     |
|                    | XhoI_PGD_R         | AACTCGAG TCTGCCTGCAGATAGATG      |
| <b>35S:OsEXPA7</b> | Xba_5UTR_OsEXPA7_F | TCTAGA TCGCACTCACAATGTCG         |
|                    | SacI_OsEXPA7_R     | GAGCTC TCAGACCCGGAAGTTCTTG       |
| <b>OsEXPA7:GUS</b> | EXPA7promoter_B1_F | AAAAAGCAGGCTTACCAAAATTTGCCTATGAT |
|                    | EXPA7promoter_B2_R | AGAAAGCTGGGTTGTGAGTGCGAGTGGC     |

F, forward primer; R, reverse primer.

**Supplement Table 2.** List of primer sequences used for RT-PCR analysis.

| Name                  | Primer sequence (5' -> 3') |
|-----------------------|----------------------------|
| <i>OsACT11-F_qRT</i>  | CAGCCACACTGTCCCCATCTA      |
| <i>OsACT11-R_qRT</i>  | AGCAAGGTCGAGACGAAGGA       |
| <i>OsEXPA7-F_qRT</i>  | GCATCGTCCCCGTCTCCTA        |
| <i>OsEXPA7-R_qRT</i>  | GTTCGTGATCAGCACCAGGTT      |
| <i>OsSOD1-F_qRT</i>   | CACCACCAATGGTTGCATGT       |
| <i>OsSOD1-R_qRT</i>   | TGGCGGGTCTCATCTTCTG        |
| <i>OsAPX1-F_qRT</i>   | GGGTTCTGACCACCTAAGG        |
| <i>OsAPX1-R_qRT</i>   | CCAGAGAGGGCAACAATGT        |
| <i>OsAPX2-F_qRT</i>   | AGCTGCCAAGTGACAAAGC        |
| <i>OsAPX2-R_qRT</i>   | CCTCATCCGCAGCATATTTTC      |
| <i>OsPOX8-F_qRT</i>   | TCTCAGGTGCGCACACGAT        |
| <i>OsPOX8-R_qRT</i>   | GCGTCGATGTTGGTCTCGTT       |
| <i>OsPOD1-F_qRT</i>   | GTCCGCAAGATCAGCGACTT       |
| <i>OsPOD1-R_qRT</i>   | CGGAGTGGAAGGTGACGAT        |
| <i>OsP5CS1-F_qRT</i>  | AAGGTGGGCACTGCAGTTGT       |
| <i>OsP5CS1-R_qRT</i>  | TCCTTAACCTGCTCGCACAGA      |
| <i>OsNHX4-F_qRT</i>   | TCGCGAATCCTGAGGTT          |
| <i>OsNHX4-R_qRT</i>   | ACCTGGAAGCCTGCATTG         |
| <i>OsSOS1-F_qRT</i>   | TCAGAATGGTGCCAGCTT         |
| <i>OsSOS1-R_qRT</i>   | CGTACATGCTCAGCTGCAAT       |
| <i>OsARF23-F_qRT</i>  | CCAAATGGTACGCAAAGGAC       |
| <i>OsARF23-R_qRT</i>  | TCTAACTCGCTGCTATTGCC       |
| <i>OsWAK1-F_qRT</i>   | GAGATGTCAAGCCAGCCAAC       |
| <i>OsWAK1-R_qRT</i>   | GCCTAACTTGGAGGACCCAA       |
| <i>OsSAPK2-F_qRT</i>  | TGCCGTCAAGTTCATCGA         |
| <i>OsSAPK2-R_qRT</i>  | GCCTCAGTGACCTGTGGTT        |
| <i>OsWRKY71-F_qRT</i> | GATGGGTACCAATGGAGGAA       |
| <i>OsWRKY71-R_qRT</i> | GCGGGAGCAAATGAGCAT         |

F, forward primer; R, reverse primer.

**Supplemental Table 3.** Total gene ontology (GO) terms for the DEGs in WT and *OsEXAP7*-OX plants under salt stress.

| GO TYPE                    | GO NAME                                       | UP       | DOWN     |
|----------------------------|-----------------------------------------------|----------|----------|
| <b>Biological Process</b>  | metabolic process                             | 66 26.9% | 89 29.7% |
|                            | cellular process                              | 59 24.1% | 82 27.3% |
|                            | biological regulation                         | 20 8.2%  | 25 8.3%  |
|                            | Localization                                  | 19 7.8%  | 10 3.3%  |
|                            | regulation of biological process              | 18 7.3%  | 23 7.7%  |
|                            | response to stimulus                          | 12 4.9%  | 20 6.7%  |
|                            | Signaling                                     | 8 3.3%   | 6 2.0%   |
|                            | cellular component organization or biogenesis | 8 3.3%   | 12 4.0%  |
|                            | multicellular organismal process              | 8 3.3%   | 6 2.0%   |
|                            | developmental process                         | 7 2.9%   | 6 2.0%   |
|                            | reproductive process                          | 5 2.0%   | 3 1.0%   |
|                            | Reproduction                                  | 5 2.0%   | 3 1.0%   |
|                            | multi-organism process                        | 4 1.6%   | 4 1.3%   |
|                            | rhythmic process                              | 2 0.8%   | 0 0.0%   |
|                            | negative regulation of biological process     | 1 0.4%   | 1 0.3%   |
|                            | cell population proliferation                 | 1 0.4%   | 0 0.0%   |
|                            | positive regulation of biological process     | 1 0.4%   | 4 1.3%   |
|                            | Growth                                        | 1 0.4%   | 0 0.0%   |
|                            | immune system process                         | 0 0.0%   | 4 1.3%   |
|                            | Detoxification                                | 0 0.0%   | 1 0.3%   |
| carbon utilization         | 0 0.0%                                        | 1 0.3%   |          |
| <b>Molecular Function</b>  | Binding                                       | 68 45.3% | 77 43.8% |
|                            | catalytic activity                            | 63 42.0% | 79 44.9% |
|                            | transporter activity                          | 7 4.7%   | 4 2.3%   |
|                            | transcription regulator activity              | 6 4.0%   | 9 5.1%   |
|                            | molecular function regulator                  | 2 1.3%   | 1 0.6%   |
|                            | molecular transducer activity                 | 2 1.3%   | 1 0.6%   |
|                            | structural molecule activity                  | 1 0.7%   | 2 1.1%   |
|                            | nutrient reservoir activity                   | 1 0.7%   | 0 0.0%   |
|                            | translation regulator activity                | 0 0.0%   | 1 0.6%   |
|                            | antioxidant activity                          | 0 0.0%   | 1 0.6%   |
|                            | molecular transducer activity                 | 0 0.0%   | 1 0.6%   |
|                            | <b>Cellular component</b>                     | Cell     | 59 19.0% |
| cell part                  |                                               | 58 18.7% | 68 22.9% |
| Membrane                   |                                               | 52 16.8% | 35 11.8% |
| membrane part              |                                               | 46 14.8% | 29 9.8%  |
| Organelle                  |                                               | 44 14.2% | 43 14.5% |
| protein-containing complex |                                               | 21 6.8%  | 27 9.1%  |
| organelle part             |                                               | 19 6.1%  | 17 5.7%  |
| extracellular region       |                                               | 4 1.3%   | 4 1.3%   |
| membrane-enclosed lumen    |                                               | 2 0.6%   | 2 0.7%   |
| extracellular region part  |                                               | 2 0.6%   | 0 0.0%   |

|                        |     |      |     |      |
|------------------------|-----|------|-----|------|
| supramolecular complex | 1   | 0.3% | 0   | 0.0% |
| cell junction          | 1   | 0.3% | 2   | 0.7% |
| Symplast               | 1   | 0.3% | 2   | 0.7% |
| Total                  | 705 | 1478 | 773 |      |

**Supplemental Table 4.** List of candidate genes for salt stress tolerance among the DEGs, detected by RNA-sequencing (lower than log<sub>2</sub> scale-fold).

| Gene name      | Gene ID          | Up or down ratio<br>(Log <sub>2</sub> FoldChange) | Function                                                                               |
|----------------|------------------|---------------------------------------------------|----------------------------------------------------------------------------------------|
| <i>OsNHX4</i>  | LOC_Os06g21360.1 | up (0.32)                                         | Response to salt stress;regulation of intracellular pH;potassium ion homeostasis       |
| <i>OsGAP1</i>  | LOC_Os02g22130.1 | up (0.62)                                         | response to wounding;response to salt stress;abscisic acid-activated signaling pathway |
| <i>OsCPK13</i> | LOC_Os04g49510.1 | up (0.42)                                         | abscisic acid-activated signaling pathway                                              |
| <i>OsSalT</i>  | LOC_Os01g24710.1 | up (1.47)                                         | salt stress-induced protein                                                            |
| <i>OsTPP1</i>  | LOC_Os02g44230.1 | up(0.91)                                          | response to salt stress                                                                |
| <i>OsANN4</i>  | LOC_Os05g31760.1 | up(1.81)                                          | response to salt stress                                                                |
| <i>OsMAPK5</i> | LOC_Os03g17700.1 | up (0.37)                                         | stress-responsive MAPK gene                                                            |

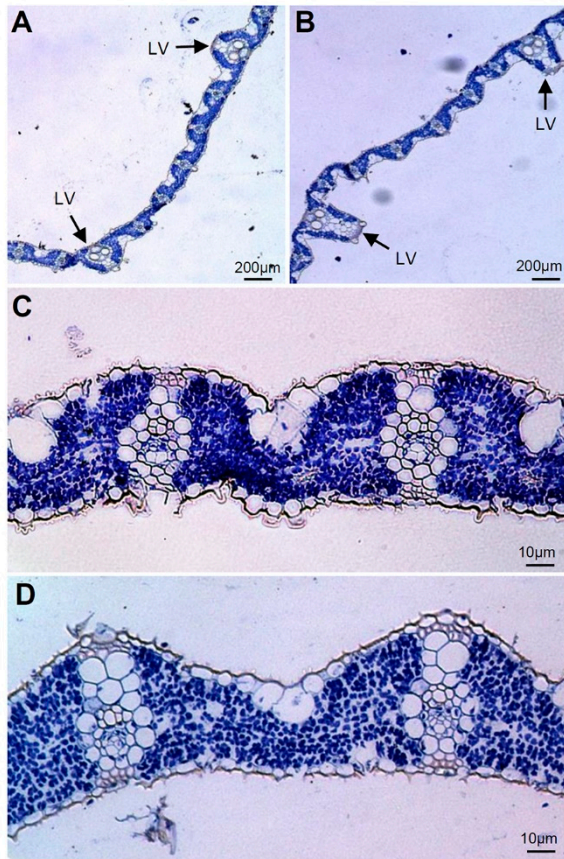

**Supplemental Figure 1.** Longitudinal section of leaf blades in WT (A, C) and *OsEXPA7-OX* plants (B, D). Large and small veins in WT (A) and *OsEXPA7-OX* (B), and enlarged small veins of WT (C) and *OsEXPA7-OX* (D). LV, long vein.

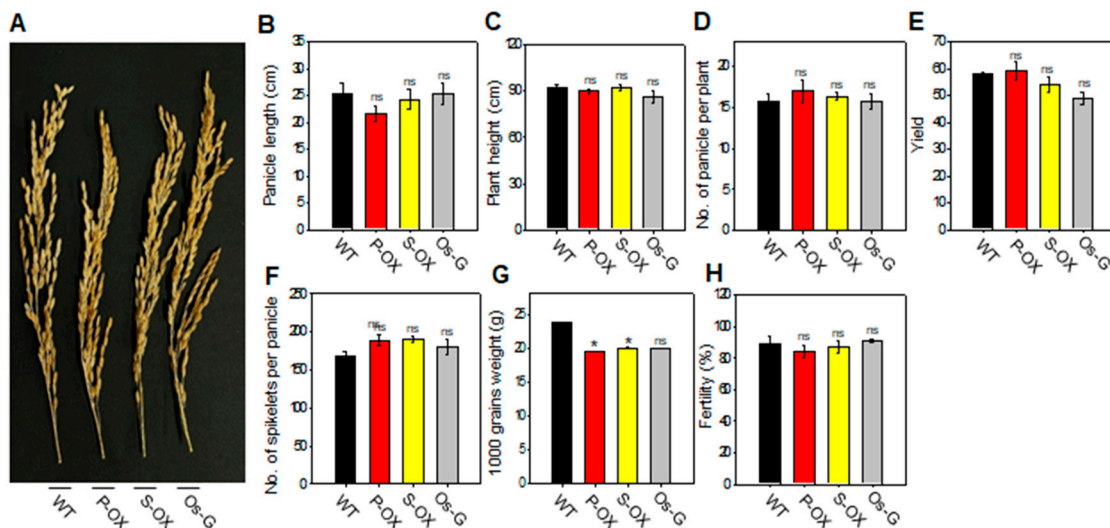

**Supplemental Figure 2.** Comparison of yield and yield components among three kinds of transgenic plants. Panicle phenotype (A), length of panicle (B), plant height (C), number of panicles per plant (D),

yield (E), number of spikelets per panicle (F), 1000 grains weight (G), and fertility (H). WT, wildtype; P-OX, PGD:*OsEXPA7*, S-OX, 35S:*OsEXPA7*; Os-G, OsEXPA7:*GUS*. Asterisks indicate significant difference examined by Student's t-test. Statistical significance was shown with \* $p < 0.05$ .
